# Supplementary material for: Dust sputtering within the inner heliosphere
Source: Copernicus journal article supplement (doi:10.5194/angeo-2020-30), 2020-05-08
Supplement: Supplementary file 1 [file supplement_material.pdf › supplement_material.pdf]

# 1 $\text{Fe}_{0.4}\text{Mg}_{0.6}\text{O}$

Table 1:  $\text{Fe}_{0.4}\text{Mg}_{0.6}\text{O}$  dust temperatures and corresponding vapor pressures as function of distance from the sun (R)

| R[km]     | Temperature[K] |           |           | vapor pressure[Pa] |           |           |
|-----------|----------------|-----------|-----------|--------------------|-----------|-----------|
|           | r=1 nm         | r=5nm     | r=20nm    | r=1 nm             | r=5nm     | r=20nm    |
| 1.496e+09 | 3.462e+03      | 3.464e+03 | 3.490e+03 | 1.106e+05          | 1.116e+05 | 1.254e+05 |
| 1.567e+09 | 3.403e+03      | 3.405e+03 | 3.432e+03 | 8.454e+04          | 8.533e+04 | 9.659e+04 |
| 1.642e+09 | 3.345e+03      | 3.347e+03 | 3.374e+03 | 6.435e+04          | 6.497e+04 | 7.384e+04 |
| 1.720e+09 | 3.288e+03      | 3.290e+03 | 3.317e+03 | 4.880e+04          | 4.928e+04 | 5.624e+04 |
| 1.802e+09 | 3.231e+03      | 3.234e+03 | 3.261e+03 | 3.668e+04          | 3.724e+04 | 4.268e+04 |
| 1.888e+09 | 3.176e+03      | 3.178e+03 | 3.206e+03 | 2.760e+04          | 2.789e+04 | 3.227e+04 |
| 1.978e+09 | 3.121e+03      | 3.124e+03 | 3.151e+03 | 2.058e+04          | 2.091e+04 | 2.418e+04 |
| 2.072e+09 | 3.068e+03      | 3.070e+03 | 3.098e+03 | 1.537e+04          | 1.554e+04 | 1.815e+04 |
| 2.170e+09 | 3.015e+03      | 3.017e+03 | 3.045e+03 | 1.137e+04          | 1.150e+04 | 1.350e+04 |
| 2.274e+09 | 2.962e+03      | 2.965e+03 | 2.992e+03 | 8.322e+03          | 8.473e+03 | 9.940e+03 |
| 2.382e+09 | 2.911e+03      | 2.913e+03 | 2.941e+03 | 6.106e+03          | 6.181e+03 | 7.335e+03 |
| 2.495e+09 | 2.860e+03      | 2.863e+03 | 2.890e+03 | 4.433e+03          | 4.519e+03 | 5.358e+03 |
| 2.614e+09 | 2.811e+03      | 2.813e+03 | 2.841e+03 | 3.226e+03          | 3.269e+03 | 3.924e+03 |
| 2.739e+09 | 2.762e+03      | 2.764e+03 | 2.792e+03 | 2.323e+03          | 2.355e+03 | 2.844e+03 |
| 2.869e+09 | 2.714e+03      | 2.716e+03 | 2.743e+03 | 1.666e+03          | 1.690e+03 | 2.040e+03 |
| 3.006e+09 | 2.666e+03      | 2.669e+03 | 2.696e+03 | 1.182e+03          | 1.208e+03 | 1.467e+03 |
| 3.149e+09 | 2.620e+03      | 2.622e+03 | 2.649e+03 | 8.405e+02          | 8.533e+02 | 1.043e+03 |
| 3.299e+09 | 2.574e+03      | 2.576e+03 | 2.603e+03 | 5.910e+02          | 6.003e+02 | 7.390e+02 |
| 3.456e+09 | 2.529e+03      | 2.531e+03 | 2.558e+03 | 4.139e+02          | 4.206e+02 | 5.214e+02 |
| 3.620e+09 | 2.485e+03      | 2.487e+03 | 2.514e+03 | 2.887e+02          | 2.935e+02 | 3.666e+02 |
| 3.793e+09 | 2.441e+03      | 2.444e+03 | 2.470e+03 | 1.989e+02          | 2.041e+02 | 2.546e+02 |
| 3.973e+09 | 2.399e+03      | 2.401e+03 | 2.427e+03 | 1.377e+02          | 1.401e+02 | 1.762e+02 |
| 4.163e+09 | 2.357e+03      | 2.359e+03 | 2.385e+03 | 9.410e+01          | 9.585e+01 | 1.214e+02 |
| 4.361e+09 | 2.316e+03      | 2.318e+03 | 2.343e+03 | 6.408e+01          | 6.532e+01 | 8.265e+01 |
| 4.569e+09 | 2.275e+03      | 2.277e+03 | 2.303e+03 | 4.306e+01          | 4.392e+01 | 5.658e+01 |
| 4.786e+09 | 2.236e+03      | 2.238e+03 | 2.263e+03 | 2.913e+01          | 2.973e+01 | 3.824e+01 |
| 5.014e+09 | 2.197e+03      | 2.199e+03 | 2.224e+03 | 1.944e+01          | 1.985e+01 | 2.575e+01 |
| 5.253e+09 | 2.159e+03      | 2.161e+03 | 2.185e+03 | 1.293e+01          | 1.321e+01 | 1.711e+01 |
| 5.503e+09 | 2.121e+03      | 2.123e+03 | 2.147e+03 | 8.480e+00          | 8.674e+00 | 1.134e+01 |
| 5.765e+09 | 2.084e+03      | 2.086e+03 | 2.110e+03 | 5.544e+00          | 5.675e+00 | 7.485e+00 |
| 6.039e+09 | 2.048e+03      | 2.050e+03 | 2.074e+03 | 3.615e+00          | 3.703e+00 | 4.930e+00 |
| 6.327e+09 | 2.013e+03      | 2.015e+03 | 2.038e+03 | 2.352e+00          | 2.411e+00 | 3.202e+00 |
| 6.628e+09 | 1.978e+03      | 1.980e+03 | 2.003e+03 | 1.507e+00          | 1.547e+00 | 2.074e+00 |
| 6.944e+09 | 1.944e+03      | 1.946e+03 | 1.969e+03 | 9.640e-01          | 9.901e-01 | 1.341e+00 |
| 7.274e+09 | 1.911e+03      | 1.913e+03 | 1.935e+03 | 6.156e-01          | 6.329e-01 | 8.543e-01 |
| 7.621e+09 | 1.878e+03      | 1.880e+03 | 1.902e+03 | 3.872e-01          | 3.984e-01 | 5.433e-01 |
| 7.984e+09 | 1.846e+03      | 1.848e+03 | 1.869e+03 | 2.432e-01          | 2.505e-01 | 3.402e-01 |
| 8.364e+09 | 1.815e+03      | 1.816e+03 | 1.838e+03 | 1.526e-01          | 1.550e-01 | 2.159e-01 |
| 8.762e+09 | 1.784e+03      | 1.786e+03 | 1.806e+03 | 9.430e-02          | 9.733e-02 | 1.329e-01 |
| 9.179e+09 | 1.754e+03      | 1.755e+03 | 1.776e+03 | 5.826e-02          | 5.921e-02 | 8.307e-02 |
| 9.616e+09 | 1.724e+03      | 1.726e+03 | 1.746e+03 | 3.541e-02          | 3.662e-02 | 5.110e-02 |
| 1.007e+10 | 1.695e+03      | 1.696e+03 | 1.716e+03 | 2.152e-02          | 2.190e-02 | 3.092e-02 |
| 1.055e+10 | 1.666e+03      | 1.668e+03 | 1.687e+03 | 1.287e-02          | 1.334e-02 | 1.871e-02 |
| 1.106e+10 | 1.638e+03      | 1.640e+03 | 1.659e+03 | 7.700e-03          | 7.992e-03 | 1.134e-02 |
| 1.158e+10 | 1.611e+03      | 1.612e+03 | 1.631e+03 | 4.616e-03          | 4.705e-03 | 6.754e-03 |
| 1.213e+10 | 1.584e+03      | 1.585e+03 | 1.604e+03 | 2.721e-03          | 2.775e-03 | 4.031e-03 |
| 1.271e+10 | 1.557e+03      | 1.559e+03 | 1.577e+03 | 1.575e-03          | 1.641e-03 | 2.365e-03 |
| 1.332e+10 | 1.531e+03      | 1.533e+03 | 1.551e+03 | 9.142e-04          | 9.539e-04 | 1.391e-03 |
| 1.395e+10 | 1.506e+03      | 1.507e+03 | 1.525e+03 | 5.326e-04          | 5.444e-04 | 8.043e-04 |
| 1.462e+10 | 1.481e+03      | 1.482e+03 | 1.500e+03 | 3.048e-04          | 3.118e-04 | 4.666e-04 |
| 1.531e+10 | 1.457e+03      | 1.458e+03 | 1.475e+03 | 1.753e-04          | 1.794e-04 | 2.659e-04 |
| 1.604e+10 | 1.433e+03      | 1.434e+03 | 1.451e+03 | 9.898e-05          | 1.014e-04 | 1.522e-04 |
| 1.680e+10 | 1.409e+03      | 1.410e+03 | 1.427e+03 | 5.484e-05          | 5.623e-05 | 8.555e-05 |
| 1.760e+10 | 1.386e+03      | 1.387e+03 | 1.403e+03 | 3.057e-05          | 3.137e-05 | 4.717e-05 |

*Continued on next page*

Table 1 – *Continued from previous page*

| d[km]     | Temperature[K] |           |           | vapor pressure[Pa] |           |           |
|-----------|----------------|-----------|-----------|--------------------|-----------|-----------|
|           | r=1 nm         | r=5nm     | r=20nm    | r=1 nm             | r=5nm     | r=20nm    |
| 1.844e+10 | 1.363e+03      | 1.364e+03 | 1.380e+03 | 1.671e-05          | 1.716e-05 | 2.616e-05 |
| 1.932e+10 | 1.341e+03      | 1.342e+03 | 1.358e+03 | 9.204e-06          | 9.461e-06 | 1.462e-05 |
| 2.024e+10 | 1.319e+03      | 1.320e+03 | 1.335e+03 | 4.971e-06          | 5.115e-06 | 7.796e-06 |
| 2.121e+10 | 1.297e+03      | 1.298e+03 | 1.314e+03 | 2.631e-06          | 2.709e-06 | 4.310e-06 |
| 2.221e+10 | 1.276e+03      | 1.277e+03 | 1.292e+03 | 1.405e-06          | 1.448e-06 | 2.270e-06 |
| 2.327e+10 | 1.255e+03      | 1.256e+03 | 1.271e+03 | 7.348e-07          | 7.582e-07 | 1.206e-06 |
| 2.438e+10 | 1.235e+03      | 1.236e+03 | 1.250e+03 | 3.885e-07          | 4.013e-07 | 6.278e-07 |
| 2.554e+10 | 1.214e+03      | 1.216e+03 | 1.230e+03 | 1.946e-07          | 2.081e-07 | 3.302e-07 |
| 2.676e+10 | 1.195e+03      | 1.196e+03 | 1.210e+03 | 1.020e-07          | 1.056e-07 | 1.702e-07 |
| 2.803e+10 | 1.175e+03      | 1.176e+03 | 1.190e+03 | 5.055e-08          | 5.239e-08 | 8.578e-08 |
| 2.937e+10 | 1.156e+03      | 1.157e+03 | 1.171e+03 | 2.538e-08          | 2.633e-08 | 4.381e-08 |
| 3.076e+10 | 1.137e+03      | 1.138e+03 | 1.152e+03 | 1.246e-08          | 1.294e-08 | 2.189e-08 |
| 3.223e+10 | 1.119e+03      | 1.120e+03 | 1.133e+03 | 6.210e-09          | 6.458e-09 | 1.069e-08 |
| 3.376e+10 | 1.100e+03      | 1.101e+03 | 1.115e+03 | 2.906e-09          | 3.027e-09 | 5.304e-09 |
| 3.537e+10 | 1.082e+03      | 1.083e+03 | 1.096e+03 | 1.382e-09          | 1.441e-09 | 2.469e-09 |
| 3.706e+10 | 1.065e+03      | 1.066e+03 | 1.079e+03 | 6.695e-10          | 6.990e-10 | 1.218e-09 |
| 3.882e+10 | 1.047e+03      | 1.048e+03 | 1.061e+03 | 3.030e-10          | 3.169e-10 | 5.626e-10 |
| 4.067e+10 | 1.030e+03      | 1.031e+03 | 1.044e+03 | 1.398e-10          | 1.464e-10 | 2.648e-10 |
| 4.261e+10 | 1.013e+03      | 1.014e+03 | 1.026e+03 | 6.283e-11          | 6.590e-11 | 1.161e-10 |
| 4.463e+10 | 9.962e+02      | 9.972e+02 | 1.009e+03 | 2.777e-11          | 2.917e-11 | 5.185e-11 |
| 4.676e+10 | 9.797e+02      | 9.807e+02 | 9.928e+02 | 1.212e-11          | 1.276e-11 | 2.346e-11 |
| 4.899e+10 | 9.634e+02      | 9.643e+02 | 9.763e+02 | 5.199e-12          | 5.452e-12 | 1.018e-11 |
| 5.132e+10 | 9.473e+02      | 9.482e+02 | 9.600e+02 | 2.191e-12          | 2.301e-12 | 4.342e-12 |
| 5.376e+10 | 9.313e+02      | 9.323e+02 | 9.440e+02 | 9.010e-13          | 9.533e-13 | 1.828e-12 |
| 5.632e+10 | 9.156e+02      | 9.165e+02 | 9.281e+02 | 3.657e-13          | 3.855e-13 | 7.516e-13 |
| 5.900e+10 | 9.001e+02      | 9.010e+02 | 9.125e+02 | 1.456e-13          | 1.538e-13 | 3.050e-13 |
| 6.181e+10 | 8.847e+02      | 8.856e+02 | 8.970e+02 | 5.653e-14          | 5.979e-14 | 1.207e-13 |
| 6.476e+10 | 8.695e+02      | 8.704e+02 | 8.816e+02 | 2.150e-14          | 2.278e-14 | 4.654e-14 |
| 6.784e+10 | 8.544e+02      | 8.553e+02 | 8.665e+02 | 7.952e-15          | 8.446e-15 | 1.769e-14 |
| 7.107e+10 | 8.395e+02      | 8.404e+02 | 8.515e+02 | 2.879e-15          | 3.064e-15 | 6.543e-15 |
| 7.446e+10 | 8.248e+02      | 8.256e+02 | 8.366e+02 | 1.019e-15          | 1.080e-15 | 2.352e-15 |
| 7.800e+10 | 8.101e+02      | 8.110e+02 | 8.219e+02 | 3.476e-16          | 3.717e-16 | 8.269e-16 |
| 8.171e+10 | 7.956e+02      | 7.965e+02 | 8.073e+02 | 1.157e-16          | 1.240e-16 | 2.819e-16 |
| 8.561e+10 | 7.812e+02      | 7.821e+02 | 7.928e+02 | 3.727e-17          | 4.005e-17 | 9.312e-17 |
| 8.968e+10 | 7.670e+02      | 7.678e+02 | 7.785e+02 | 1.170e-17          | 1.250e-17 | 3.000e-17 |
| 9.395e+10 | 7.528e+02      | 7.536e+02 | 7.642e+02 | 3.516e-18          | 3.767e-18 | 9.263e-18 |
| 9.843e+10 | 7.387e+02      | 7.395e+02 | 7.501e+02 | 1.018e-18          | 1.093e-18 | 2.783e-18 |
| 1.031e+11 | 7.247e+02      | 7.255e+02 | 7.360e+02 | 2.834e-19          | 3.053e-19 | 7.984e-19 |
| 1.080e+11 | 7.108e+02      | 7.116e+02 | 7.221e+02 | 7.576e-20          | 8.185e-20 | 2.223e-19 |
| 1.132e+11 | 6.970e+02      | 6.978e+02 | 7.082e+02 | 1.940e-20          | 2.103e-20 | 5.885e-20 |
| 1.186e+11 | 6.832e+02      | 6.840e+02 | 6.944e+02 | 4.703e-21          | 5.114e-21 | 1.492e-20 |
| 1.242e+11 | 6.695e+02      | 6.703e+02 | 6.807e+02 | 1.087e-21          | 1.186e-21 | 3.616e-21 |
| 1.301e+11 | 6.559e+02      | 6.567e+02 | 6.670e+02 | 2.388e-22          | 2.615e-22 | 8.264e-22 |
| 1.363e+11 | 6.423e+02      | 6.431e+02 | 6.534e+02 | 4.920e-23          | 5.409e-23 | 1.795e-22 |
| 1.428e+11 | 6.287e+02      | 6.296e+02 | 6.398e+02 | 9.462e-24          | 1.058e-23 | 3.653e-23 |
| 1.496e+11 | 6.153e+02      | 6.161e+02 | 6.263e+02 | 1.735e-24          | 1.924e-24 | 7.021e-24 |

Table 2: Sputtering yield for Fe<sub>0.4</sub>Mg<sub>0.6</sub>O

| Ion | fast SW conditions |        |        | slow SW conditions |        |        | CME conditions |        |        |
|-----|--------------------|--------|--------|--------------------|--------|--------|----------------|--------|--------|
|     | Y Fe               | Y Mg   | Y O    | Y Fe               | Y Mg   | Y O    | Y Fe           | Y Mg   | Y O    |
| H   | 0.0058             | 0.0168 | 0.0224 | 0.0083             | 0.0288 | 0.0379 | 0.0077         | 0.0261 | 0.0353 |
| He  | 0.0297             | 0.0865 | 0.1158 | 0.0621             | 0.1663 | 0.2293 | 0.0533         | 0.1498 | 0.1910 |
| C   | 0.1682             | 0.4592 | 0.6273 | 0.2878             | 0.7942 | 1.0600 | 0.2482         | 0.6800 | 0.9350 |
| O   | 0.2643             | 0.7043 | 0.9621 | 0.3812             | 1.0600 | 1.4400 | 0.3546         | 0.9845 | 1.3200 |
| N   | 0.2002             | 0.5531 | 0.7485 | 0.3505             | 0.9414 | 1.2700 | 0.2949         | 0.8078 | 1.1000 |
| Fe  | 0.8645             | 2.3300 | 3.1900 | 0.9622             | 2.6800 | 3.6600 | 0.9612         | 2.6600 | 3.6000 |
| Ne  | 0.3295             | 0.8883 | 1.2000 | 0.4828             | 1.3400 | 1.8000 | 0.4438         | 1.2100 | 1.6600 |
| Mg  | 0.3966             | 1.0700 | 1.4500 | 0.5667             | 1.5700 | 2.1200 | 0.5240         | 1.4400 | 1.9400 |
| Si  | 0.4718             | 1.2600 | 1.7000 | 0.6210             | 1.7300 | 2.3400 | 0.5878         | 1.6000 | 2.1600 |
| S   | 0.5632             | 1.5300 | 2.1000 | 0.6807             | 1.9100 | 2.5900 | 0.6482         | 1.7800 | 2.4300 |

## 2 Silicate

Table 3: Silicate dust temperatures and corresponding vapor pressures as function of distance from the sun (R)

| R[km]     | Temperature[K] |           |           | vapor pressure[Pa] |           |           |
|-----------|----------------|-----------|-----------|--------------------|-----------|-----------|
|           | r=1 nm         | r=5nm     | r=20nm    | r=1 nm             | r=5nm     | r=20nm    |
| 1.496e+09 | 3.185e+03      | 3.187e+03 | 3.215e+03 | 4.284e+04          | 4.324e+04 | 4.926e+04 |
| 1.567e+09 | 3.124e+03      | 3.126e+03 | 3.154e+03 | 3.215e+04          | 3.246e+04 | 3.704e+04 |
| 1.642e+09 | 3.064e+03      | 3.066e+03 | 3.094e+03 | 2.415e+04          | 2.438e+04 | 2.788e+04 |
| 1.720e+09 | 3.005e+03      | 3.007e+03 | 3.035e+03 | 1.815e+04          | 1.833e+04 | 2.100e+04 |
| 1.802e+09 | 2.947e+03      | 2.949e+03 | 2.977e+03 | 1.364e+04          | 1.378e+04 | 1.582e+04 |
| 1.888e+09 | 2.891e+03      | 2.892e+03 | 2.920e+03 | 1.031e+04          | 1.036e+04 | 1.193e+04 |
| 1.978e+09 | 2.835e+03      | 2.837e+03 | 2.864e+03 | 7.744e+03          | 7.824e+03 | 8.986e+03 |
| 2.072e+09 | 2.780e+03      | 2.782e+03 | 2.809e+03 | 5.812e+03          | 5.874e+03 | 6.767e+03 |
| 2.170e+09 | 2.726e+03      | 2.728e+03 | 2.755e+03 | 4.357e+03          | 4.404e+03 | 5.091e+03 |
| 2.274e+09 | 2.673e+03      | 2.675e+03 | 2.702e+03 | 3.259e+03          | 3.296e+03 | 3.824e+03 |
| 2.382e+09 | 2.621e+03      | 2.623e+03 | 2.650e+03 | 2.433e+03          | 2.460e+03 | 2.867e+03 |
| 2.495e+09 | 2.570e+03      | 2.572e+03 | 2.598e+03 | 1.811e+03          | 1.832e+03 | 2.132e+03 |
| 2.614e+09 | 2.519e+03      | 2.521e+03 | 2.548e+03 | 1.336e+03          | 1.352e+03 | 1.590e+03 |
| 2.739e+09 | 2.470e+03      | 2.472e+03 | 2.498e+03 | 9.875e+02          | 9.999e+02 | 1.175e+03 |
| 2.869e+09 | 2.421e+03      | 2.423e+03 | 2.449e+03 | 7.228e+02          | 7.322e+02 | 8.650e+02 |
| 3.006e+09 | 2.374e+03      | 2.375e+03 | 2.401e+03 | 5.304e+02          | 5.339e+02 | 6.344e+02 |
| 3.149e+09 | 2.326e+03      | 2.328e+03 | 2.354e+03 | 3.823e+02          | 3.876e+02 | 4.634e+02 |
| 3.299e+09 | 2.280e+03      | 2.282e+03 | 2.307e+03 | 2.761e+02          | 2.801e+02 | 3.346e+02 |
| 3.456e+09 | 2.235e+03      | 2.236e+03 | 2.261e+03 | 1.984e+02          | 1.999e+02 | 2.405e+02 |
| 3.620e+09 | 2.190e+03      | 2.192e+03 | 2.216e+03 | 1.409e+02          | 1.431e+02 | 1.720e+02 |
| 3.793e+09 | 2.146e+03      | 2.147e+03 | 2.172e+03 | 9.945e+01          | 1.003e+02 | 1.224e+02 |
| 3.973e+09 | 2.103e+03      | 2.104e+03 | 2.128e+03 | 6.983e+01          | 7.042e+01 | 8.591e+01 |
| 4.163e+09 | 2.060e+03      | 2.061e+03 | 2.085e+03 | 4.835e+01          | 4.877e+01 | 5.998e+01 |
| 4.361e+09 | 2.018e+03      | 2.019e+03 | 2.043e+03 | 3.327e+01          | 3.357e+01 | 4.163e+01 |
| 4.569e+09 | 1.976e+03      | 1.978e+03 | 2.001e+03 | 2.254e+01          | 2.297e+01 | 2.848e+01 |
| 4.786e+09 | 1.936e+03      | 1.937e+03 | 1.960e+03 | 1.532e+01          | 1.548e+01 | 1.935e+01 |
| 5.014e+09 | 1.896e+03      | 1.897e+03 | 1.920e+03 | 1.025e+01          | 1.036e+01 | 1.307e+01 |
| 5.253e+09 | 1.856e+03      | 1.858e+03 | 1.880e+03 | 6.741e+00          | 6.887e+00 | 8.687e+00 |
| 5.503e+09 | 1.817e+03      | 1.819e+03 | 1.841e+03 | 4.402e+00          | 4.501e+00 | 5.734e+00 |
| 5.765e+09 | 1.779e+03      | 1.780e+03 | 1.803e+03 | 2.854e+00          | 2.888e+00 | 3.760e+00 |
| 6.039e+09 | 1.741e+03      | 1.743e+03 | 1.765e+03 | 1.816e+00          | 1.861e+00 | 2.422e+00 |
| 6.327e+09 | 1.704e+03      | 1.705e+03 | 1.727e+03 | 1.147e+00          | 1.162e+00 | 1.530e+00 |
| 6.628e+09 | 1.667e+03      | 1.669e+03 | 1.690e+03 | 7.102e-01          | 7.293e-01 | 9.593e-01 |
| 6.944e+09 | 1.631e+03      | 1.633e+03 | 1.654e+03 | 4.362e-01          | 4.484e-01 | 5.970e-01 |
| 7.274e+09 | 1.595e+03      | 1.597e+03 | 1.618e+03 | 2.621e-01          | 2.697e-01 | 3.638e-01 |
| 7.621e+09 | 1.560e+03      | 1.562e+03 | 1.582e+03 | 1.561e-01          | 1.609e-01 | 2.168e-01 |
| 7.984e+09 | 1.526e+03      | 1.527e+03 | 1.548e+03 | 9.231e-02          | 9.378e-02 | 1.300e-01 |
| 8.364e+09 | 1.491e+03      | 1.493e+03 | 1.513e+03 | 5.242e-02          | 5.418e-02 | 7.504e-02 |

*Continued on next page*

Table 3 – *Continued from previous page*

| d[km]     | Temperature[K] |           |           | vapor pressure[Pa] |           |           |
|-----------|----------------|-----------|-----------|--------------------|-----------|-----------|
|           | r=1 nm         | r=5nm     | r=20nm    | r=1 nm             | r=5nm     | r=20nm    |
| 8.762e+09 | 1.458e+03      | 1.459e+03 | 1.479e+03 | 2.999e-02          | 3.052e-02 | 4.291e-02 |
| 9.179e+09 | 1.424e+03      | 1.426e+03 | 1.445e+03 | 1.643e-02          | 1.703e-02 | 2.390e-02 |
| 9.616e+09 | 1.391e+03      | 1.393e+03 | 1.412e+03 | 8.908e-03          | 9.252e-03 | 1.319e-02 |
| 1.007e+10 | 1.359e+03      | 1.360e+03 | 1.380e+03 | 4.785e-03          | 4.881e-03 | 7.218e-03 |
| 1.055e+10 | 1.327e+03      | 1.328e+03 | 1.347e+03 | 2.496e-03          | 2.549e-03 | 3.762e-03 |
| 1.106e+10 | 1.295e+03      | 1.297e+03 | 1.316e+03 | 1.262e-03          | 1.318e-03 | 1.982e-03 |
| 1.158e+10 | 1.264e+03      | 1.265e+03 | 1.284e+03 | 6.309e-04          | 6.455e-04 | 9.903e-04 |
| 1.213e+10 | 1.233e+03      | 1.234e+03 | 1.253e+03 | 3.050e-04          | 3.124e-04 | 4.894e-04 |
| 1.271e+10 | 1.203e+03      | 1.204e+03 | 1.222e+03 | 1.458e-04          | 1.495e-04 | 2.336e-04 |
| 1.332e+10 | 1.173e+03      | 1.174e+03 | 1.192e+03 | 6.719e-05          | 6.899e-05 | 1.102e-04 |
| 1.395e+10 | 1.143e+03      | 1.144e+03 | 1.162e+03 | 2.978e-05          | 3.062e-05 | 5.010e-05 |
| 1.462e+10 | 1.114e+03      | 1.115e+03 | 1.133e+03 | 1.303e-05          | 1.342e-05 | 2.250e-05 |
| 1.531e+10 | 1.085e+03      | 1.086e+03 | 1.104e+03 | 5.466e-06          | 5.637e-06 | 9.706e-06 |
| 1.604e+10 | 1.056e+03      | 1.057e+03 | 1.075e+03 | 2.191e-06          | 2.263e-06 | 4.009e-06 |
| 1.680e+10 | 1.028e+03      | 1.029e+03 | 1.047e+03 | 8.648e-07          | 8.947e-07 | 1.633e-06 |
| 1.760e+10 | 1.001e+03      | 1.002e+03 | 1.019e+03 | 3.368e-07          | 3.491e-07 | 6.349e-07 |
| 1.844e+10 | 9.732e+02      | 9.743e+02 | 9.910e+02 | 1.211e-07          | 1.262e-07 | 2.346e-07 |
| 1.932e+10 | 9.464e+02      | 9.475e+02 | 9.639e+02 | 4.280e-08          | 4.472e-08 | 8.494e-08 |
| 2.024e+10 | 9.200e+02      | 9.211e+02 | 9.373e+02 | 1.453e-08          | 1.522e-08 | 2.969e-08 |
| 2.121e+10 | 8.941e+02      | 8.951e+02 | 9.110e+02 | 4.746e-09          | 4.962e-09 | 9.917e-09 |
| 2.221e+10 | 8.686e+02      | 8.696e+02 | 8.853e+02 | 1.483e-09          | 1.554e-09 | 3.200e-09 |
| 2.327e+10 | 8.436e+02      | 8.446e+02 | 8.600e+02 | 4.443e-10          | 4.668e-10 | 9.870e-10 |
| 2.438e+10 | 8.192e+02      | 8.202e+02 | 8.352e+02 | 1.280e-10          | 1.349e-10 | 2.918e-10 |
| 2.554e+10 | 7.952e+02      | 7.962e+02 | 8.109e+02 | 3.507e-11          | 3.707e-11 | 8.250e-11 |
| 2.676e+10 | 7.718e+02      | 7.728e+02 | 7.872e+02 | 9.207e-12          | 9.765e-12 | 2.239e-11 |
| 2.803e+10 | 7.490e+02      | 7.499e+02 | 7.640e+02 | 2.315e-12          | 2.448e-12 | 5.793e-12 |
| 2.937e+10 | 7.268e+02      | 7.277e+02 | 7.414e+02 | 5.565e-13          | 5.906e-13 | 1.434e-12 |
| 3.076e+10 | 7.051e+02      | 7.060e+02 | 7.193e+02 | 1.269e-13          | 1.352e-13 | 3.372e-13 |
| 3.223e+10 | 6.841e+02      | 6.849e+02 | 6.979e+02 | 2.782e-14          | 2.952e-14 | 7.620e-14 |
| 3.376e+10 | 6.637e+02      | 6.645e+02 | 6.771e+02 | 5.814e-15          | 6.193e-15 | 1.643e-14 |
| 3.537e+10 | 6.439e+02      | 6.447e+02 | 6.569e+02 | 1.158e-15          | 1.239e-15 | 3.377e-15 |
| 3.706e+10 | 6.247e+02      | 6.255e+02 | 6.373e+02 | 2.200e-16          | 2.362e-16 | 6.618e-16 |
| 3.882e+10 | 6.061e+02      | 6.069e+02 | 6.183e+02 | 3.981e-17          | 4.294e-17 | 1.236e-16 |
| 4.067e+10 | 5.882e+02      | 5.890e+02 | 6.000e+02 | 6.941e-18          | 7.522e-18 | 2.221e-17 |
| 4.261e+10 | 5.710e+02      | 5.717e+02 | 5.823e+02 | 1.169e-18          | 1.259e-18 | 3.813e-18 |
| 4.463e+10 | 5.543e+02      | 5.550e+02 | 5.652e+02 | 1.865e-19          | 2.019e-19 | 6.257e-19 |
| 4.676e+10 | 5.382e+02      | 5.389e+02 | 5.488e+02 | 2.855e-20          | 3.105e-20 | 9.946e-20 |
| 4.899e+10 | 5.228e+02      | 5.234e+02 | 5.329e+02 | 4.254e-21          | 4.591e-21 | 1.501e-20 |
| 5.132e+10 | 5.079e+02      | 5.085e+02 | 5.177e+02 | 6.042e-22          | 6.551e-22 | 2.209e-21 |
| 5.376e+10 | 4.936e+02      | 4.942e+02 | 5.030e+02 | 8.309e-23          | 9.052e-23 | 3.101e-22 |
| 5.632e+10 | 4.799e+02      | 4.804e+02 | 4.889e+02 | 1.112e-23          | 1.199e-23 | 4.221e-23 |
| 5.900e+10 | 4.666e+02      | 4.672e+02 | 4.753e+02 | 1.408e-24          | 1.550e-24 | 5.511e-24 |
| 6.181e+10 | 4.539e+02      | 4.544e+02 | 4.623e+02 | 1.749e-25          | 1.903e-25 | 7.039e-25 |
| 6.476e+10 | 4.417e+02      | 4.422e+02 | 4.498e+02 | 2.106e-26          | 2.302e-26 | 8.698e-26 |
| 6.784e+10 | 4.300e+02      | 4.305e+02 | 4.377e+02 | 2.471e-27          | 2.714e-27 | 1.026e-26 |
| 7.107e+10 | 4.187e+02      | 4.192e+02 | 4.261e+02 | 2.784e-28          | 3.074e-28 | 1.178e-27 |
| 7.446e+10 | 4.079e+02      | 4.083e+02 | 4.150e+02 | 3.086e-29          | 3.354e-29 | 1.327e-28 |
| 7.800e+10 | 3.975e+02      | 3.979e+02 | 4.043e+02 | 3.314e-30          | 3.618e-30 | 1.444e-29 |
| 8.171e+10 | 3.875e+02      | 3.879e+02 | 3.940e+02 | 3.463e-31          | 3.799e-31 | 1.523e-30 |
| 8.561e+10 | 3.778e+02      | 3.782e+02 | 3.842e+02 | 3.455e-32          | 3.808e-32 | 1.602e-31 |
| 8.968e+10 | 3.685e+02      | 3.689e+02 | 3.746e+02 | 3.382e-33          | 3.747e-33 | 1.573e-32 |
| 9.395e+10 | 3.596e+02      | 3.600e+02 | 3.655e+02 | 3.269e-34          | 3.640e-34 | 1.558e-33 |
| 9.843e+10 | 3.510e+02      | 3.514e+02 | 3.567e+02 | 3.055e-35          | 3.420e-35 | 1.489e-34 |
| 1.031e+11 | 3.428e+02      | 3.431e+02 | 3.482e+02 | 2.854e-36          | 3.119e-36 | 1.377e-35 |
| 1.080e+11 | 3.348e+02      | 3.351e+02 | 3.400e+02 | 2.525e-37          | 2.772e-37 | 1.237e-36 |
| 1.132e+11 | 3.271e+02      | 3.274e+02 | 3.321e+02 | 2.188e-38          | 2.412e-38 | 1.085e-37 |
| 1.186e+11 | 3.197e+02      | 3.200e+02 | 3.245e+02 | 1.866e-39          | 2.066e-39 | 9.332e-39 |
| 1.242e+11 | 3.125e+02      | 3.128e+02 | 3.172e+02 | 1.521e-40          | 1.692e-40 | 7.915e-40 |
| 1.301e+11 | 3.056e+02      | 3.059e+02 | 3.101e+02 | 1.232e-41          | 1.377e-41 | 6.426e-41 |

*Continued on next page*

Table 3 – *Continued from previous page*

| d[km]     | Temperature[K] |           |           | vapor pressure[Pa] |           |           |
|-----------|----------------|-----------|-----------|--------------------|-----------|-----------|
|           | r=1 nm         | r=5nm     | r=20nm    | r=1 nm             | r=5nm     | r=20nm    |
| 1.363e+11 | 2.989e+02      | 2.992e+02 | 3.033e+02 | 9.601e-43          | 1.079e-42 | 5.195e-42 |
| 1.428e+11 | 2.924e+02      | 2.927e+02 | 2.967e+02 | 7.222e-44          | 8.159e-44 | 4.050e-43 |
| 1.496e+11 | 2.862e+02      | 2.864e+02 | 2.903e+02 | 5.487e-45          | 5.973e-45 | 3.054e-44 |

Table 4: Sputtering yield for astronomical silicate (MgFeSiO<sub>4</sub>)

| Ion | fast SW conditions |        |        |        | slow SW conditions |        |        |        | CME conditions |        |        |        |
|-----|--------------------|--------|--------|--------|--------------------|--------|--------|--------|----------------|--------|--------|--------|
|     | Y Mg               | Y Fe   | Y Si   | Y O    | Y Mg               | Y Fe   | Y Si   | Y O    | Y Mg           | Y Fe   | Y Si   | Y O    |
| H   | 0.0059             | 0.0034 | 0.0030 | 0.0209 | 0.0109             | 0.0047 | 0.0040 | 0.0346 | 0.0103         | 0.0049 | 0.0391 | 0.0305 |
| He  | 0.0316             | 0.0179 | 0.0158 | 0.0997 | 0.0643             | 0.0354 | 0.0334 | 0.2199 | 0.0540         | 0.0281 | 0.0254 | 0.1696 |
| C   | 0.1809             | 0.0999 | 0.0875 | 0.5699 | 0.3014             | 0.1603 | 0.1469 | 0.9641 | 0.2663         | 0.1440 | 0.1341 | 0.8738 |
| O   | 0.2526             | 0.1401 | 0.1245 | 0.8138 | 0.4103             | 0.2171 | 0.1974 | 1.3400 | 0.3605         | 0.2008 | 0.1814 | 1.1800 |
| N   | 0.2159             | 0.1183 | 0.1096 | 0.7044 | 0.3614             | 0.1924 | 0.1759 | 1.1600 | 0.3209         | 0.1748 | 0.1613 | 1.0400 |
| Fe  | 0.8735             | 0.4798 | 0.4412 | 2.8600 | 0.9772             | 0.5234 | 0.4762 | 3.1800 | 0.9751         | 0.5217 | 0.4816 | 3.1700 |
| Ne  | 0.3213             | 0.1784 | 0.1634 | 1.0600 | 0.4925             | 0.2704 | 0.2458 | 1.6000 | 0.4367         | 0.2343 | 0.2133 | 1.4100 |
| Mg  | 0.3964             | 0.2142 | 0.1924 | 1.2800 | 0.5636             | 0.3010 | 0.2769 | 1.8200 | 0.5222         | 0.2875 | 0.2575 | 1.7100 |
| Si  | 0.4783             | 0.2589 | 0.2393 | 1.5700 | 0.6416             | 0.3502 | 0.3141 | 2.0900 | 0.5772         | 0.3054 | 0.2834 | 1.8700 |
| S   | 0.5407             | 0.2945 | 0.2688 | 1.7500 | 0.7136             | 0.3899 | 0.3431 | 2.3100 | 0.6676         | 0.3534 | 0.3217 | 2.1300 |

### 3 Carbon

Table 5: Carbon dust temperatures and corresponding vapor pressures as function of distance from the sun (R)

| R[km]     | Temperature[K] |           |           | vapor pressure[Pa] |           |           |
|-----------|----------------|-----------|-----------|--------------------|-----------|-----------|
|           | r=1 nm         | r=5nm     | r=20nm    | r=1 nm             | r=5nm     | r=20nm    |
| 1.496e+09 | 3.276e+03      | 3.278e+03 | 3.314e+03 | 8.910e+02          | 9.070e+02 | 1.240e+03 |
| 1.643e+09 | 3.157e+03      | 3.160e+03 | 3.195e+03 | 2.960e+02          | 3.050e+02 | 4.250e+02 |
| 1.805e+09 | 3.043e+03      | 3.045e+03 | 3.080e+03 | 9.530e+01          | 9.730e+01 | 1.390e+02 |
| 1.983e+09 | 2.933e+03      | 2.935e+03 | 2.969e+03 | 2.930e+01          | 3.000e+01 | 4.360e+01 |
| 2.179e+09 | 2.827e+03      | 2.829e+03 | 2.863e+03 | 8.640e+00          | 8.850e+00 | 1.320e+01 |
| 2.393e+09 | 2.724e+03      | 2.727e+03 | 2.760e+03 | 2.410e+00          | 2.500e+00 | 3.800e+00 |
| 2.629e+09 | 2.626e+03      | 2.628e+03 | 2.661e+03 | 6.490e-01          | 6.680e-01 | 1.050e+00 |
| 2.888e+09 | 2.531e+03      | 2.533e+03 | 2.565e+03 | 1.660e-01          | 1.710e-01 | 2.730e-01 |
| 3.173e+09 | 2.439e+03      | 2.442e+03 | 2.473e+03 | 3.980e-02          | 4.180e-02 | 6.830e-02 |
| 3.486e+09 | 2.351e+03      | 2.353e+03 | 2.384e+03 | 9.180e-03          | 9.500e-03 | 1.610e-02 |
| 3.829e+09 | 2.267e+03      | 2.269e+03 | 2.299e+03 | 2.030e-03          | 2.110e-03 | 3.660e-03 |
| 4.206e+09 | 2.185e+03      | 2.187e+03 | 2.216e+03 | 4.180e-04          | 4.350e-04 | 7.710e-04 |
| 4.621e+09 | 2.106e+03      | 2.108e+03 | 2.137e+03 | 8.090e-05          | 8.450e-05 | 1.560e-04 |
| 5.076e+09 | 2.030e+03      | 2.032e+03 | 2.060e+03 | 1.480e-05          | 1.550e-05 | 2.940e-05 |
| 5.576e+09 | 1.957e+03      | 1.959e+03 | 1.986e+03 | 2.550e-06          | 2.680e-06 | 5.210e-06 |
| 6.126e+09 | 1.887e+03      | 1.889e+03 | 1.915e+03 | 4.170e-07          | 4.400e-07 | 8.740e-07 |
| 6.730e+09 | 1.819e+03      | 1.821e+03 | 1.846e+03 | 6.270e-08          | 6.640e-08 | 1.350e-07 |
| 7.393e+09 | 1.754e+03      | 1.756e+03 | 1.780e+03 | 8.940e-09          | 9.510e-09 | 1.980e-08 |
| 8.121e+09 | 1.691e+03      | 1.693e+03 | 1.717e+03 | 1.170e-09          | 1.250e-09 | 2.760e-09 |
| 8.921e+09 | 1.630e+03      | 1.632e+03 | 1.655e+03 | 1.410e-10          | 1.520e-10 | 3.430e-10 |
| 9.801e+09 | 1.572e+03      | 1.573e+03 | 1.596e+03 | 1.620e-11          | 1.690e-11 | 4.050e-11 |
| 1.077e+10 | 1.516e+03      | 1.517e+03 | 1.539e+03 | 1.720e-12          | 1.790e-12 | 4.410e-12 |
| 1.183e+10 | 1.461e+03      | 1.463e+03 | 1.484e+03 | 1.600e-13          | 1.750e-13 | 4.410e-13 |
| 1.299e+10 | 1.409e+03      | 1.410e+03 | 1.431e+03 | 1.430e-14          | 1.500e-14 | 4.050e-14 |
| 1.427e+10 | 1.359e+03      | 1.360e+03 | 1.380e+03 | 1.180e-15          | 1.240e-15 | 3.430e-15 |
| 1.568e+10 | 1.310e+03      | 1.311e+03 | 1.330e+03 | 8.470e-17          | 8.950e-17 | 2.540e-16 |

*Continued on next page*

Table 5 – *Continued from previous page*

| d[km]     | Temperature[K] |           |           | vapor pressure[Pa] |           |           |
|-----------|----------------|-----------|-----------|--------------------|-----------|-----------|
|           | r=1 nm         | r=5nm     | r=20nm    | r=1 nm             | r=5nm     | r=20nm    |
| 1.722e+10 | 1.263e+03      | 1.264e+03 | 1.283e+03 | 5.600e-18          | 5.950e-18 | 1.820e-17 |
| 1.892e+10 | 1.218e+03      | 1.219e+03 | 1.237e+03 | 3.420e-19          | 3.640e-19 | 1.140e-18 |
| 2.079e+10 | 1.174e+03      | 1.175e+03 | 1.193e+03 | 1.800e-20          | 1.930e-20 | 6.590e-20 |
| 2.283e+10 | 1.132e+03      | 1.133e+03 | 1.150e+03 | 8.780e-22          | 9.460e-22 | 3.290e-21 |
| 2.509e+10 | 1.092e+03      | 1.093e+03 | 1.109e+03 | 3.980e-23          | 4.310e-23 | 1.520e-22 |
| 2.756e+10 | 1.053e+03      | 1.054e+03 | 1.069e+03 | 1.550e-24          | 1.690e-24 | 6.050e-24 |
| 3.027e+10 | 1.015e+03      | 1.016e+03 | 1.031e+03 | 5.190e-26          | 5.700e-26 | 2.240e-25 |
| 3.326e+10 | 9.780e+02      | 9.790e+02 | 9.940e+02 | 1.470e-27          | 1.630e-27 | 7.100e-27 |
| 3.653e+10 | 9.430e+02      | 9.440e+02 | 9.590e+02 | 3.910e-29          | 4.350e-29 | 2.120e-28 |
| 4.013e+10 | 9.100e+02      | 9.110e+02 | 9.240e+02 | 9.890e-31          | 1.110e-30 | 4.860e-30 |
| 4.409e+10 | 8.770e+02      | 8.780e+02 | 8.910e+02 | 1.900e-32          | 2.150e-32 | 1.050e-31 |
| 4.843e+10 | 8.450e+02      | 8.460e+02 | 8.590e+02 | 3.060e-34          | 3.490e-34 | 1.930e-33 |
| 5.320e+10 | 8.150e+02      | 8.160e+02 | 8.280e+02 | 4.740e-36          | 5.480e-36 | 2.990e-35 |
| 5.845e+10 | 7.860e+02      | 7.870e+02 | 7.990e+02 | 6.260e-38          | 7.300e-38 | 4.530e-37 |
| 6.421e+10 | 7.580e+02      | 7.580e+02 | 7.700e+02 | 7.000e-40          | 7.000e-40 | 5.000e-39 |
| 7.053e+10 | 7.300e+02      | 7.310e+02 | 7.420e+02 | 5.540e-42          | 6.630e-42 | 4.610e-41 |
| 7.748e+10 | 7.040e+02      | 7.050e+02 | 7.160e+02 | 4.400e-44          | 5.330e-44 | 4.280e-43 |
| 8.512e+10 | 6.790e+02      | 6.790e+02 | 6.900e+02 | 2.960e-46          | 2.960e-46 | 2.800e-45 |
| 9.351e+10 | 6.540e+02      | 6.550e+02 | 6.650e+02 | 1.360e-48          | 1.700e-48 | 1.530e-47 |
| 1.027e+11 | 6.310e+02      | 6.310e+02 | 6.410e+02 | 6.600e-51          | 6.600e-51 | 7.020e-50 |
| 1.128e+11 | 6.080e+02      | 6.090e+02 | 6.180e+02 | 0.000e+00          | 0.000e+00 | 2.730e-52 |
| 1.240e+11 | 5.860e+02      | 5.870e+02 | 5.960e+02 | 0.000e+00          | 0.000e+00 | 0.000e+00 |
| 1.362e+11 | 5.650e+02      | 5.660e+02 | 5.740e+02 | 0.000e+00          | 0.000e+00 | 0.000e+00 |
| 1.496e+11 | 5.450e+02      | 5.450e+02 | 5.540e+02 | 0.000e+00          | 0.000e+00 | 0.000e+00 |

Table 6: Sputtering yield for carbon.

| Ion | Y fast SW | Y slow SW | Y CME  |
|-----|-----------|-----------|--------|
| H   | 0.0034    | 0.0076    | 0.0055 |
| He  | 0.0211    | 0.0567    | 0.0365 |
| C   | 0.1063    | 0.2389    | 0.1706 |
| O   | 0.1728    | 0.3614    | 0.2689 |
| N   | 0.1204    | 0.2606    | 0.1902 |
| Fe  | 1.3500    | 1.3500    | 1.3500 |
| Ne  | 0.3303    | 0.4620    | 0.4267 |
| Mg  | 0.6000    | 0.6000    | 0.6000 |
| Si  | 0.7200    | 0.7200    | 0.7200 |
| S   | 0.8300    | 0.8300    | 0.8300 |
